# Supplementary material for: A Novel Core Genome-Encoded Superantigen Contributes to Lethality of Community-Associated MRSA Necrotizing Pneumonia
Source: PubMed Central journal article supplement (PMC3192841; doi:10.1371/journal.ppat.1002271), 2011-10-13

Fig S4

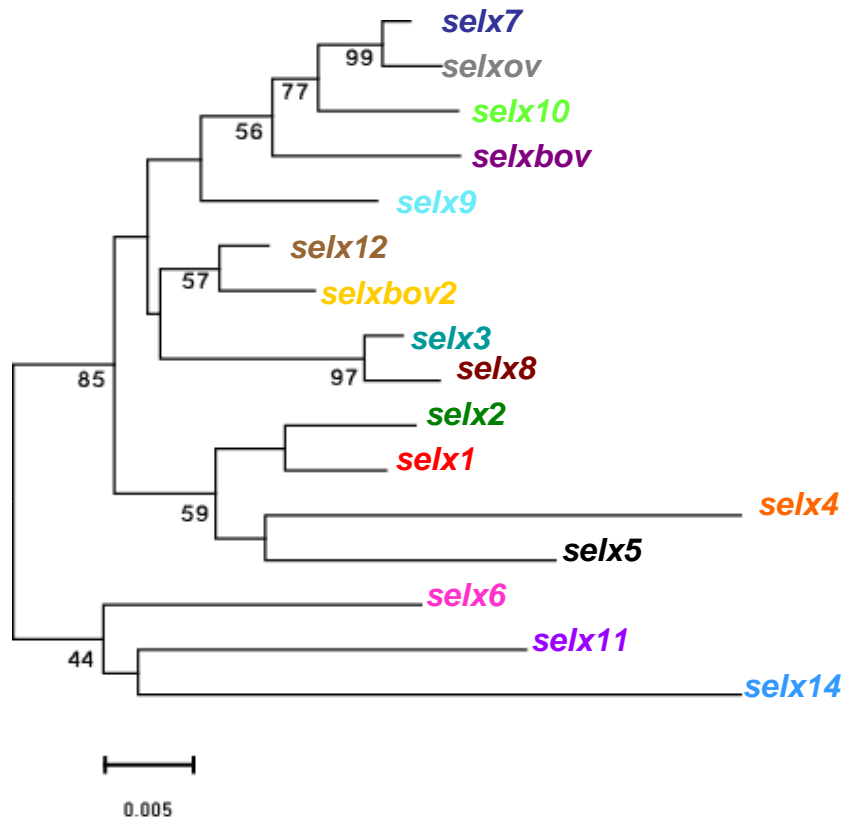

Supplement: ppat.1002271.s004.pdf [file ppat.1002271.s004.pdf]
